# Supplementary material
Source: HighWire-hosted journal article supplement (https://bmjpaedsopen.bmj.com/content/5/1/e001117)
Supplement: inline-supplementary-material-3 [file inline-supplementary-material-3.pdf]

## JBI Critical Appraisal Checklist

### JBI Critical Appraisal Checklist for Studies Reporting Prevalence Data

Reviewer \_\_\_\_\_

Date \_\_\_\_\_

Author \_\_\_\_\_

Year \_\_\_\_\_

Record Number \_\_\_\_\_

**Yes   No   Unclear   Not applicable**

- |                                                                                       |                          |                          |                          |                          |
|---------------------------------------------------------------------------------------|--------------------------|--------------------------|--------------------------|--------------------------|
| 1. Was the sample frame appropriate to address the target population?                 | <input type="checkbox"/> | <input type="checkbox"/> | <input type="checkbox"/> | <input type="checkbox"/> |
| 2. Were study participants sampled in an appropriate way?                             | <input type="checkbox"/> | <input type="checkbox"/> | <input type="checkbox"/> | <input type="checkbox"/> |
| 3. Was the sample size adequate?                                                      | <input type="checkbox"/> | <input type="checkbox"/> | <input type="checkbox"/> | <input type="checkbox"/> |
| 4. Were the study subjects and the setting described in detail?                       | <input type="checkbox"/> | <input type="checkbox"/> | <input type="checkbox"/> | <input type="checkbox"/> |
| 5. Was the data analysis conducted with sufficient coverage of the identified sample? | <input type="checkbox"/> | <input type="checkbox"/> | <input type="checkbox"/> | <input type="checkbox"/> |
| 6. Were valid methods used for the identification of the condition?                   | <input type="checkbox"/> | <input type="checkbox"/> | <input type="checkbox"/> | <input type="checkbox"/> |
| 7. Was the condition measured in a standard, reliable way                             | <input type="checkbox"/> | <input type="checkbox"/> | <input type="checkbox"/> | <input type="checkbox"/> |

for all participants?

8. Was there appropriate statistical analysis? ☐ ☐ ☐ ☐

9. Was the response rate adequate, and if not, was the low ☐ ☐ ☐ ☐

response rate managed appropriately?

**Overall appraisal:** Include ☐ Exclude ☐ Seek further info ☐

Comments (Including reason for exclusion)
